# Supplementary material
Source: PubMed Central journal article supplement (PMC5354195)
Supplement: supp_tpc.16.00790_TPC2016-00790-RAR2_Supplemental_Data.pdf [file supp_tpc.16.00790_TPC2016-00790-RAR2_Supplemental_Data.pdf]

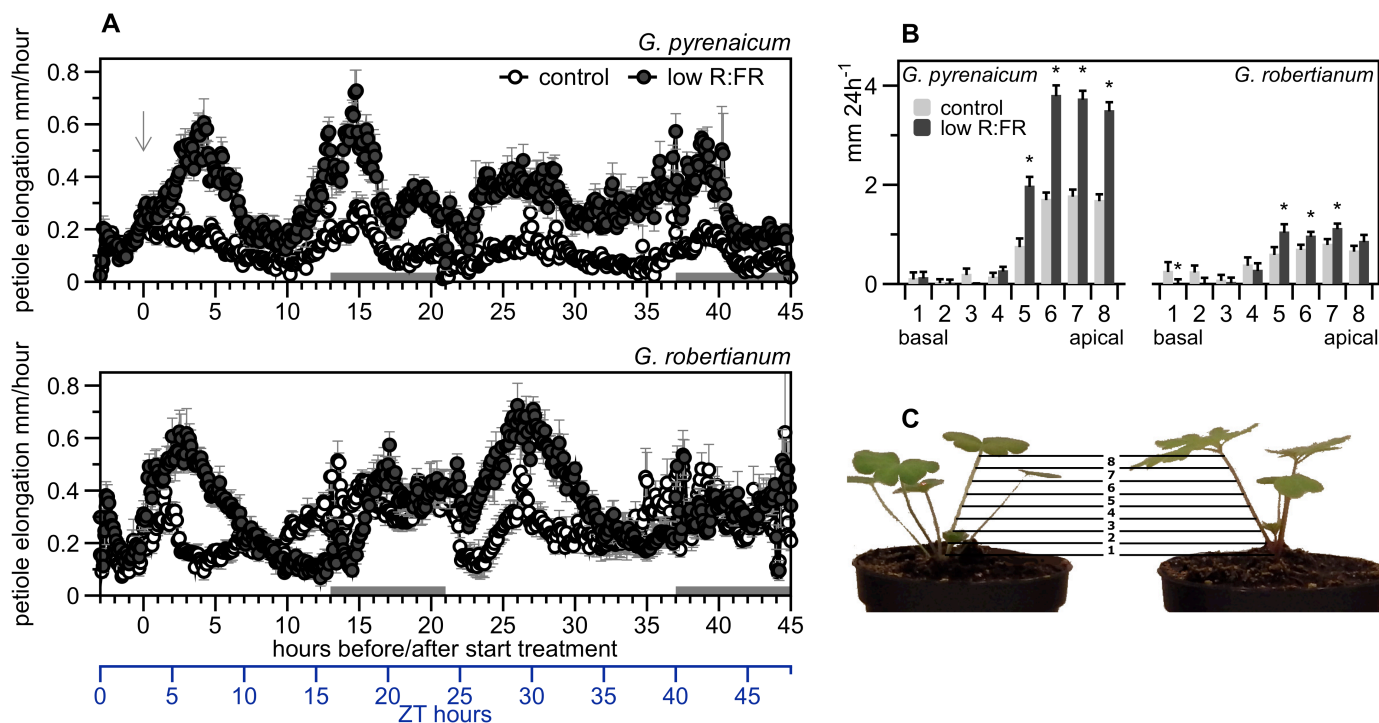

**Supplemental Figure 1. A detailed analysis of low R:FR-induced growth over the time of day and in *Geranium* petioles.** (Supports Figure 1.) (A) Growth rates of *G. pyrenaicum* and *G. robertianum* petioles (mm h<sup>-1</sup>) over 48 h, data for every 6 minutes. Plants grown in either control white light (open circles, R:FR = 1.8) or a low R:FR treatment (dark circles R:FR = 0.2), starting at time point 0 (ZT = 3 h, indicated by an arrow). Error bars represent SEM, n = 6. The grey bars at the x-axis indicate the night periods. (B) Detailed elongation (mm 24 h<sup>-1</sup>) of putative segments (1 to 8) of the *G. pyrenaicum* and *G. robertianum* petioles in control and low R:FR conditions. Data represent means ± SEM, n = 10, asterisks represent significant differences between control and low R:FR (Student's *t*-test, *p* < 0.05). (C) Representation of the 'segment' distribution over the *Geranium* petioles, of which elongation data are shown in (B).

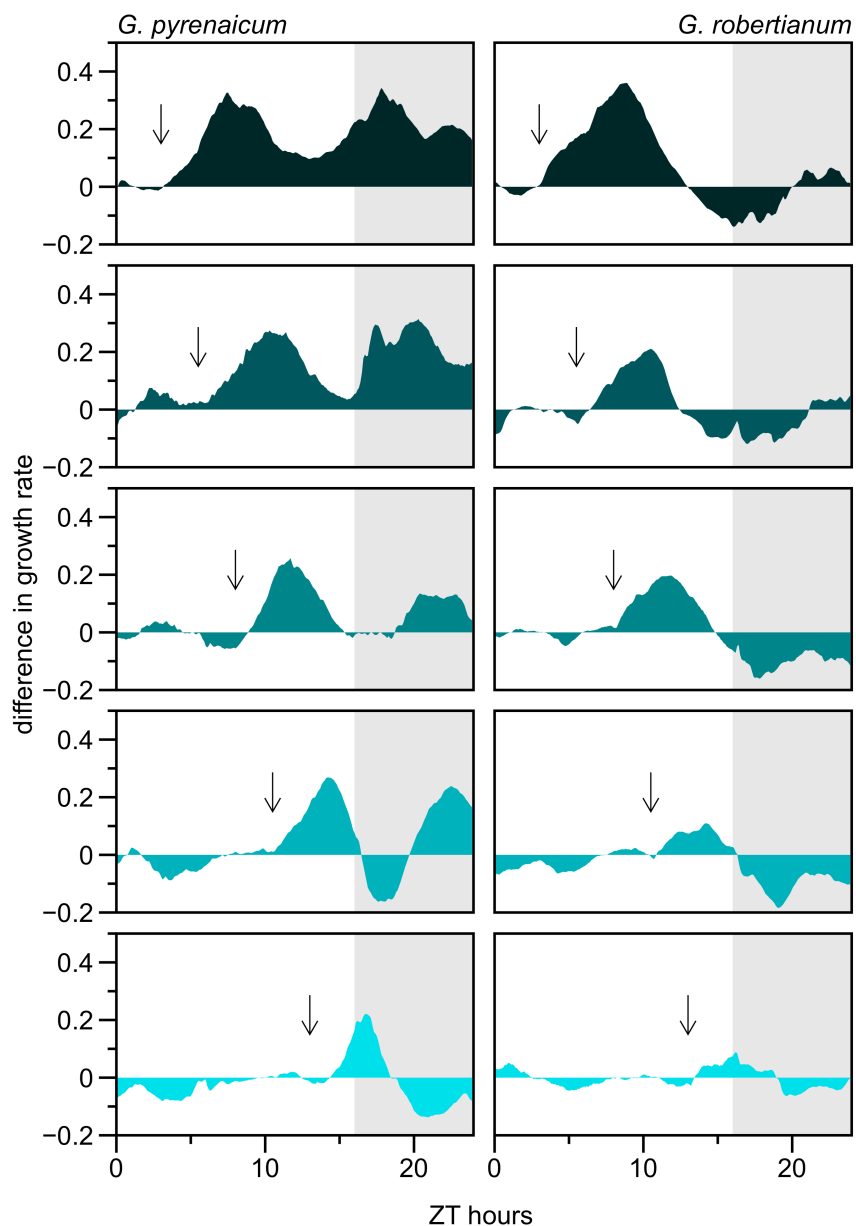

**Supplemental Figure 2. Low R:FR light suppresses petiole growth in *G. robertianum*, but not *G. pyrenaicum*, at a fixed time of the day.** (Supports Figure 1.) The difference between petiole growth rates ( $\text{mm h}^{-1}$ ) in control and low R:FR treatments with a different starting point during the photoperiod, in *G. pyrenaicum* (left) and *G. robertianum* (right). Starting point of the low R:FR light treatment is indicated by an arrow (top down ZT 3 h, 5.5 h, 8 h, 10.5 h and 13 h). Data are the same as presented in Figure 1D. Differences between the means of the two treatments are smoothed using exponential smoothing,  $n = 6$ . The grey area represents the night period.

A

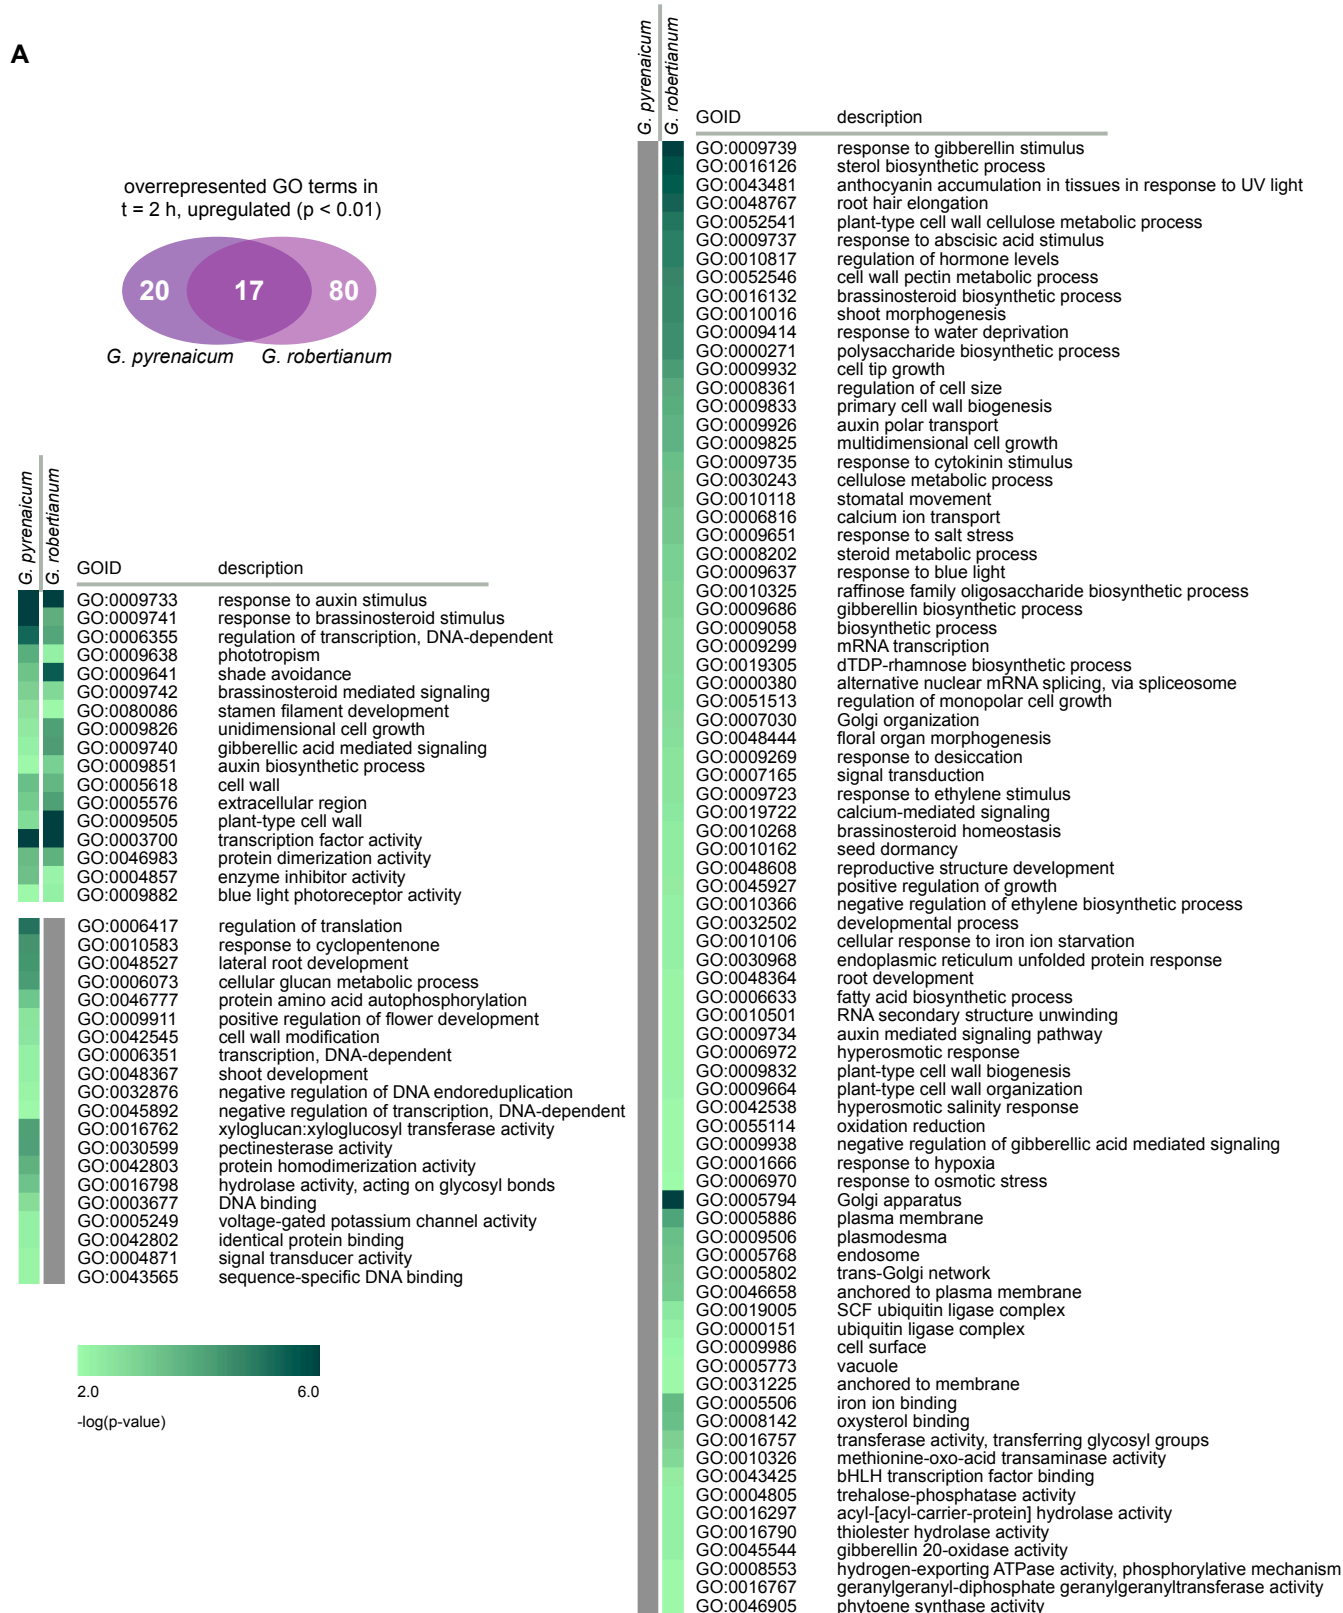

**Supplemental Figure 3. Gene ontology analysis on low R:FR induced and repressed *Geranium* OMCL groups.** (Supports Figure 3.) Venn diagrams showing the overlap in significantly overrepresented gene ontology (GO) terms (p < 0.01) among *Geranium* OMCL groups significantly (p < 0.01) up- (A, B) or down-regulated (C, D) by the low R:FR light treatment at the first (t= 2 h, A, C) or second time point (t = 11.5 h, B, D). Heat maps present these defined GO terms with description, sorted by domain (biological process, cellular component and molecular function) and -log p-values (green for up-regulated OMCL groups, blue for down-regulated OMCL groups in low R:FR). Grey areas represent non-enriched GO terms in the specific species.

B

overrepresented GO terms in  
t = 11.5 h, upregulated (p < 0.01)

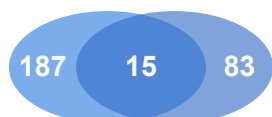

*G. pyrenaicum*   *G. robertianum*

| <i>G. pyrenaicum</i> |                                                  |  | <i>G. robertianum</i> |                                                                       |
|----------------------|--------------------------------------------------|--|-----------------------|-----------------------------------------------------------------------|
| GOID                 | description                                      |  | GOID                  | description                                                           |
| GO:0052546           | cell wall pectin metabolic process               |  | GO:0009853            | photorespiration                                                      |
| GO:0006084           | acetyl-CoA metabolic process                     |  | GO:0048825            | cotyledon development                                                 |
| GO:0016126           | sterol biosynthetic process                      |  | GO:0015031            | protein transport                                                     |
| GO:0052541           | plant-type cell wall cellulose metabolic process |  | GO:0000059            | protein import into nucleus, docking                                  |
| GO:0016132           | brassinosteroid biosynthetic process             |  | GO:0010074            | maintenance of meristem identity                                      |
| GO:0019745           | pentacyclic triterpenoid biosynthetic process    |  | GO:0009846            | pollen germination                                                    |
| GO:0009826           | unidimensional cell growth                       |  | GO:0006457            | protein folding                                                       |
| GO:0006633           | fatty acid biosynthetic process                  |  | GO:0006275            | regulation of DNA replication                                         |
| GO:0009733           | response to auxin stimulus                       |  | GO:0009113            | purine base biosynthetic process                                      |
| GO:0006816           | calcium ion transport                            |  | GO:0045489            | pectin biosynthetic process                                           |
| GO:0009741           | response to brassinosteroid stimulus             |  | GO:0048193            | Golgi vesicle transport                                               |
| GO:0046658           | anchored to plasma membrane                      |  | GO:0048366            | leaf development                                                      |
| GO:0005618           | cell wall                                        |  | GO:0009561            | megagametogenesis                                                     |
| GO:0009505           | plant-type cell wall                             |  | GO:0032508            | DNA duplex unwinding                                                  |
| GO:0031225           | anchored to membrane                             |  | GO:0007030            | Golgi organization                                                    |
| GO:0001510           | RNA methylation                                  |  | GO:0055072            | iron ion homeostasis                                                  |
| GO:0006412           | translation                                      |  | GO:0000902            | cell morphogenesis                                                    |
| GO:0009220           | pyrimidine ribonucleotide biosynthetic process   |  | GO:0000724            | double-strand break repair via homologous recombination               |
| GO:0006606           | protein import into nucleus                      |  | GO:0006351            | transcription, DNA-dependent                                          |
| GO:0042254           | ribosome biogenesis                              |  | GO:0051788            | response to misfolded protein                                         |
| GO:0006626           | protein targeting to mitochondrion               |  | GO:0051726            | regulation of cell cycle                                              |
| GO:0006406           | mRNA export from nucleus                         |  | GO:0009831            | plant-type cell wall modification during multidimensional cell growth |
| GO:0009560           | embryo sac egg cell differentiation              |  | GO:0019932            | second-messenger-mediated signaling                                   |
| GO:0009909           | regulation of flower development                 |  | GO:0032259            | methylation                                                           |
| GO:0009640           | photomorphogenesis                               |  | GO:0006396            | RNA processing                                                        |
| GO:0009165           | nucleotide biosynthetic process                  |  | GO:0016458            | gene silencing                                                        |
| GO:0010388           | cullin deneddylation                             |  | GO:0016051            | carbohydrate biosynthetic process                                     |
| GO:0000741           | karyogamy                                        |  | GO:0009736            | cytokinin mediated signaling                                          |
| GO:0006164           | purine nucleotide biosynthetic process           |  | GO:0010082            | regulation of root meristem growth                                    |
| GO:0006094           | gluconeogenesis                                  |  | GO:0010107            | potassium ion import                                                  |
| GO:0051604           | protein maturation                               |  | GO:0006268            | DNA unwinding during replication                                      |
| GO:0034968           | histone lysine methylation                       |  | GO:0006189            | 'de novo' IMP biosynthetic process                                    |
| GO:0006261           | DNA-dependent DNA replication                    |  | GO:0032875            | regulation of DNA endoreduplication                                   |
| GO:0006886           | intracellular protein transport                  |  | GO:0030244            | cellulose biosynthetic process                                        |
| GO:0000398           | nuclear mRNA splicing, via spliceosome           |  | GO:0016049            | cell growth                                                           |
| GO:0010162           | seed dormancy                                    |  | GO:0016579            | protein deubiquitination                                              |
| GO:0007010           | cytoskeleton organization                        |  | GO:0010197            | polar nucleus fusion                                                  |
| GO:0019915           | lipid storage                                    |  | GO:0006571            | tyrosine biosynthetic process                                         |
| GO:0042545           | cell wall modification                           |  | GO:0006065            | UDP-glucuronate biosynthetic process                                  |
| GO:0009933           | meristem structural organization                 |  | GO:0051510            | regulation of unidimensional cell growth                              |
| GO:0006260           | DNA replication                                  |  | GO:0006269            | DNA replication, synthesis of RNA primer                              |
| GO:0010498           | proteasomal protein catabolic process            |  | GO:0015946            | methanol oxidation                                                    |
| GO:0009664           | plant-type cell wall organization                |  | GO:0019415            | acetate biosynthetic process from carbon monoxide                     |
| GO:0006414           | translational elongation                         |  | GO:0042274            | ribosomal small subunit biogenesis                                    |
| GO:0009845           | seed germination                                 |  | GO:0031538            | negative regulation of anthocyanin metabolic process                  |
| GO:0006007           | glucose catabolic process                        |  | GO:0031120            | snRNA pseudouridine synthesis                                         |
| GO:0051567           | histone H3-K9 methylation                        |  | GO:0000380            | alternative nuclear mRNA splicing, via spliceosome                    |
| GO:0010182           | sugar mediated signaling                         |  | GO:0010501            | RNA secondary structure unwinding                                     |
| GO:0050826           | response to freezing                             |  | GO:0016567            | protein ubiquitination                                                |
| GO:0009553           | embryo sac development                           |  | GO:0009958            | positive gravitropism                                                 |
| GO:0000478           | endonucleolytic cleavages during rRNA processing |  | GO:0009793            | embryonic development ending in seed dormancy                         |
| GO:0048767           | root hair elongation                             |  | GO:0005840            | ribosome                                                              |
| GO:0016192           | vesicle-mediated transport                       |  | GO:0005730            | nucleolus                                                             |
| GO:0042991           | transcription factor import into nucleus         |  | GO:0005829            | cytosol                                                               |
| GO:0045039           | protein import into mitochondrial inner membrane |  | GO:0022625            | cytosolic large ribosomal subunit                                     |
| GO:0006913           | nucleocytoplasmic transport                      |  | GO:0022627            | cytosolic small ribosomal subunit                                     |
| GO:0006354           | RNA elongation                                   |  | GO:0005794            | Golgi apparatus                                                       |
| GO:0034976           | response to endoplasmic reticulum stress         |  | GO:0022626            | cytosolic ribosome                                                    |
| GO:0006270           | DNA replication initiation                       |  | GO:0005622            | intracellular                                                         |
| GO:0009086           | methionine biosynthetic process                  |  | GO:0009506            | plasmodesma                                                           |
| GO:0044267           | cellular protein metabolic process               |  | GO:0005802            | trans-Golgi network                                                   |
| GO:0006334           | nucleosome assembly                              |  | GO:0005774            | vacuolar membrane                                                     |
| GO:0008283           | cell proliferation                               |  | GO:0015934            | large ribosomal subunit                                               |
| GO:0006446           | regulation of translational initiation           |  | GO:0005768            | endosome                                                              |
| GO:0006096           | glycolysis                                       |  | GO:0005737            | cytoplasm                                                             |
| GO:0006413           | translational initiation                         |  | GO:0005783            | endoplasmic reticulum                                                 |
| GO:0006418           | tRNA aminoacylation for protein translation      |  | GO:0016020            | membrane                                                              |
| GO:0051301           | cell division                                    |  | GO:0015935            | small ribosomal subunit                                               |
| GO:0046686           | response to cadmium ion                          |  | GO:0005852            | eukaryotic translation initiation factor 3 complex                    |
| GO:0044070           | regulation of anion transport                    |  | GO:0005773            | vacuole                                                               |
|                      |                                                  |  | GO:0005643            | nuclear pore                                                          |



## B (continued)

| <i>G. pyrenaicum</i><br><i>G. robertianum</i> | GOID       | description                                                           | <i>G. pyrenaicum</i><br><i>G. robertianum</i> | GOID       | description                                                                          |
|-----------------------------------------------|------------|-----------------------------------------------------------------------|-----------------------------------------------|------------|--------------------------------------------------------------------------------------|
|                                               | GO:0005635 | nuclear envelope                                                      |                                               | GO:0009641 | shade avoidance                                                                      |
|                                               | GO:0005739 | mitochondrion                                                         |                                               | GO:0009737 | response to abscisic acid stimulus                                                   |
|                                               | GO:0005886 | plasma membrane                                                       |                                               | GO:0007623 | circadian rhythm                                                                     |
|                                               | GO:0005743 | mitochondrial inner membrane                                          |                                               | GO:0010105 | negative regulation of ethylene mediated signaling pathway                           |
|                                               | GO:0005741 | mitochondrial outer membrane                                          |                                               | GO:0010224 | response to UV-B                                                                     |
|                                               | GO:0000786 | nucleosome                                                            |                                               | GO:0006355 | regulation of transcription, DNA-dependent                                           |
|                                               | GO:0005732 | small nucleolar ribonucleoprotein complex                             |                                               | GO:0009651 | response to salt stress                                                              |
|                                               | GO:0030131 | clathrin adaptor complex                                              |                                               | GO:0042538 | hyperosmotic salinity response                                                       |
|                                               | GO:0005758 | mitochondrial intermembrane space                                     |                                               | GO:0005975 | carbohydrate metabolic process                                                       |
|                                               | GO:0030173 | integral to Golgi membrane                                            |                                               | GO:0010201 | response to continuous far red light stimulus by the high-irradiance response system |
|                                               | GO:0030132 | clathrin coat of coated pit                                           |                                               | GO:0010218 | response to far red light                                                            |
|                                               | GO:0005789 | endoplasmic reticulum membrane                                        |                                               | GO:0009414 | response to water deprivation                                                        |
|                                               | GO:0033588 | Elongator holoenzyme complex                                          |                                               | GO:0055114 | oxidation reduction                                                                  |
|                                               | GO:0080008 | CUL4 RING ubiquitin ligase complex                                    |                                               | GO:0080086 | stamen filament development                                                          |
|                                               | GO:0009986 | cell surface                                                          |                                               | GO:0010017 | red or far red light signaling pathway                                               |
|                                               | GO:0005753 | mitochondrial proton-transporting ATP synthase complex                |                                               | GO:0009739 | response to gibberellin stimulus                                                     |
|                                               | GO:0030117 | membrane coat                                                         |                                               | GO:0009723 | response to ethylene stimulus                                                        |
|                                               | GO:0030126 | COPI vesicle coat                                                     |                                               | GO:0048359 | mucilage metabolic process during seed coat development                              |
|                                               | GO:0015030 | Cajal body                                                            |                                               | GO:0010016 | shoot morphogenesis                                                                  |
|                                               | GO:0005759 | mitochondrial matrix                                                  |                                               | GO:0009638 | phototropism                                                                         |
|                                               | GO:0009504 | cell plate                                                            |                                               | GO:0048574 | long-day photoperiodism, flowering                                                   |
|                                               | GO:0030130 | clathrin coat of trans-Golgi network vesicle                          |                                               | GO:0009639 | response to red or far red light                                                     |
|                                               | GO:0005750 | mitochondrial respiratory chain complex III                           |                                               | GO:0007165 | signal transduction                                                                  |
|                                               | GO:0000790 | nuclear chromatin                                                     |                                               | GO:0010325 | raffinose family oligosaccharide biosynthetic process                                |
|                                               | GO:0008250 | oligosaccharyltransferase complex                                     |                                               | GO:0043496 | regulation of protein homodimerization activity                                      |
|                                               | GO:0005853 | eukaryotic translation elongation factor 1 complex                    |                                               | GO:0010203 | response to very low fluence red light stimulus                                      |
|                                               | GO:0042719 | mitochondrial intermembrane space protein transporter complex         |                                               | GO:0009686 | gibberellin biosynthetic process                                                     |
|                                               | GO:0003735 | structural constituent of ribosome                                    |                                               | GO:0009685 | gibberellin metabolic process                                                        |
|                                               | GO:0003723 | RNA binding                                                           |                                               | GO:0048444 | floral organ morphogenesis                                                           |
|                                               | GO:0003743 | translation initiation factor activity                                |                                               | GO:0009409 | response to cold                                                                     |
|                                               | GO:0005507 | copper ion binding                                                    |                                               | GO:0006073 | cellular glucan metabolic process                                                    |
|                                               | GO:0003676 | nucleic acid binding                                                  |                                               | GO:0009740 | gibberellic acid mediated signaling                                                  |
|                                               | GO:0008026 | ATP-dependent helicase activity                                       |                                               | GO:0048608 | reproductive structure development                                                   |
|                                               | GO:0015450 | P-P-bond-hydrolysis-driven protein transmembrane transporter activity |                                               | GO:0030148 | sphingolipid biosynthetic process                                                    |
|                                               | GO:0008565 | protein transporter activity                                          |                                               | GO:0080001 | mucilage extrusion from seed coat                                                    |
|                                               | GO:0003690 | double-stranded DNA binding                                           |                                               | GO:0046916 | cellular transition metal ion homeostasis                                            |
|                                               | GO:0000166 | nucleotide binding                                                    |                                               | GO:0000719 | photoreactive repair                                                                 |
|                                               | GO:0005525 | GTP binding                                                           |                                               | GO:0010187 | negative regulation of seed germination                                              |
|                                               | GO:0008168 | methyltransferase activity                                            |                                               | GO:0030643 | cellular phosphate ion homeostasis                                                   |
|                                               | GO:0004812 | aminoacyl-tRNA ligase activity                                        |                                               | GO:0010366 | negative regulation of ethylene biosynthetic process                                 |
|                                               | GO:0005085 | guanyl-nucleotide exchange factor activity                            |                                               | GO:0045493 | xylan catabolic process                                                              |
|                                               | GO:0047262 | polygalacturonate 4-alpha-galacturonosyltransferase activity          |                                               | GO:0009269 | response to desiccation                                                              |
|                                               | GO:0051082 | unfolded protein binding                                              |                                               | GO:0006598 | polyamine catabolic process                                                          |
|                                               | GO:0000175 | 3'-5'-exoribonuclease activity                                        |                                               | GO:0042752 | regulation of circadian rhythm                                                       |
|                                               | GO:0008308 | voltage-gated anion channel activity                                  |                                               | GO:0042398 | cellular amino acid derivative biosynthetic process                                  |
|                                               | GO:0003697 | single-stranded DNA binding                                           |                                               | GO:0010114 | response to red light                                                                |
|                                               | GO:0004576 | oligosaccharyl transferase activity                                   |                                               | GO:0006071 | glycerol metabolic process                                                           |
|                                               | GO:0004579 | dolichyl-diphosphooligosaccharide-protein glycotransferase activity   |                                               | GO:0006811 | ion transport                                                                        |
|                                               | GO:0003878 | ATP citrate synthase activity                                         |                                               | GO:0009650 | UV protection                                                                        |
|                                               | GO:0030515 | snoRNA binding                                                        |                                               | GO:0009851 | auxin biosynthetic process                                                           |
|                                               | GO:0008430 | selenium binding                                                      |                                               | GO:0009938 | negative regulation of gibberellic acid mediated signaling                           |
|                                               | GO:0003924 | GTPase activity                                                       |                                               | GO:0009813 | flavonoid biosynthetic process                                                       |
|                                               | GO:0003746 | translation elongation factor activity                                |                                               | GO:0009698 | phenylpropanoid metabolic process                                                    |
|                                               | GO:0046914 | transition metal ion binding                                          |                                               | GO:0005576 | extracellular region                                                                 |
|                                               | GO:0008276 | protein methyltransferase activity                                    |                                               | GO:0016604 | nuclear body                                                                         |
|                                               | GO:0008094 | DNA-dependent ATPase activity                                         |                                               | GO:0048046 | apoplast                                                                             |
|                                               | GO:0008143 | poly(A) RNA binding                                                   |                                               | GO:0042807 | central vacuole                                                                      |
|                                               | GO:0003979 | UDP-glucose 6-dehydrogenase activity                                  |                                               | GO:0019005 | SCF ubiquitin ligase complex                                                         |
|                                               | GO:0004776 | succinate-CoA ligase (GDP-forming) activity                           |                                               | GO:0003700 | transcription factor activity                                                        |
|                                               | GO:0004775 | succinate-CoA ligase (ADP-forming) activity                           |                                               | GO:0004857 | enzyme inhibitor activity                                                            |
|                                               | GO:0001872 | zymosan binding                                                       |                                               | GO:0030599 | pectinesterase activity                                                              |
|                                               |            |                                                                       |                                               | GO:0004553 | hydrolase activity, hydrolyzing O-glycosyl compounds                                 |
|                                               |            |                                                                       |                                               | GO:0042802 | identical protein binding                                                            |
|                                               |            |                                                                       |                                               | GO:0046910 | pectinesterase inhibitor activity                                                    |
|                                               |            |                                                                       |                                               | GO:0004190 | aspartic-type endopeptidase activity                                                 |
|                                               |            |                                                                       |                                               | GO:0000248 | C-5 sterol desaturase activity                                                       |
|                                               |            |                                                                       |                                               | GO:0005506 | iron ion binding                                                                     |
|                                               |            |                                                                       |                                               | GO:0010326 | methionine-oxo-acid transaminase activity                                            |
|                                               |            |                                                                       |                                               | GO:0042803 | protein homodimerization activity                                                    |
|                                               |            |                                                                       |                                               | GO:0003913 | DNA photolyase activity                                                              |
|                                               |            |                                                                       |                                               | GO:0008889 | glycerophosphodiester phosphodiesterase activity                                     |
|                                               |            |                                                                       |                                               | GO:0000155 | two-component sensor activity                                                        |
|                                               |            |                                                                       |                                               | GO:0004871 | signal transducer activity                                                           |
|                                               |            |                                                                       |                                               | GO:0016762 | xyloglucan:xyloglucosyl transferase activity                                         |
|                                               |            |                                                                       |                                               | GO:0016168 | chlorophyll binding                                                                  |
|                                               |            |                                                                       |                                               | GO:0042284 | sphingolipid delta-4 desaturase activity                                             |
|                                               |            |                                                                       |                                               | GO:0048531 | beta-1,3-galactosyltransferase activity                                              |
|                                               |            |                                                                       |                                               | GO:0046608 | carotenoid isomerase activity                                                        |
|                                               |            |                                                                       |                                               | GO:0009882 | blue light photoreceptor activity                                                    |
|                                               |            |                                                                       |                                               | GO:0005249 | voltage-gated potassium channel activity                                             |
|                                               |            |                                                                       |                                               | GO:0031516 | far-red light photoreceptor activity                                                 |
|                                               |            |                                                                       |                                               | GO:0005515 | protein binding                                                                      |
|                                               |            |                                                                       |                                               | GO:0009044 | xylan 1,4-beta-xylosidase activity                                                   |

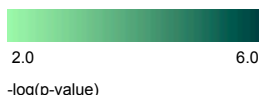

C

overrepresented GO terms in  
t = 2 h, downregulated (p < 0.01)

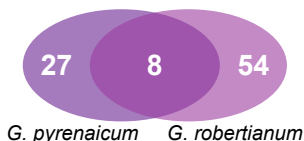

| <i>G. pyrenaicum</i> | <i>G. robertianum</i> | GOID       | description                                                                                       |
|----------------------|-----------------------|------------|---------------------------------------------------------------------------------------------------|
|                      |                       | GO:0006355 | regulation of transcription, DNA-dependent                                                        |
|                      |                       | GO:0006857 | oligopeptide transport                                                                            |
|                      |                       | GO:0006612 | protein targeting to membrane                                                                     |
|                      |                       | GO:0009753 | response to jasmonic acid stimulus                                                                |
|                      |                       | GO:0010075 | regulation of meristem growth                                                                     |
|                      |                       | GO:0003700 | transcription factor activity                                                                     |
|                      |                       | GO:0008194 | UDP-glycosyltransferase activity                                                                  |
|                      |                       | GO:0016758 | transferase activity, transferring hexosyl groups                                                 |
|                      |                       | GO:0009686 | gibberellin biosynthetic process                                                                  |
|                      |                       | GO:0030001 | metal ion transport                                                                               |
|                      |                       | GO:0000165 | MAPKKK cascade                                                                                    |
|                      |                       | GO:0010310 | regulation of hydrogen peroxide metabolic process                                                 |
|                      |                       | GO:0010023 | proanthocyanidin biosynthetic process                                                             |
|                      |                       | GO:0009862 | systemic acquired resistance, salicylic acid mediated signaling pathway                           |
|                      |                       | GO:0009867 | jasmonic acid mediated signaling pathway                                                          |
|                      |                       | GO:0048439 | flower morphogenesis                                                                              |
|                      |                       | GO:0010363 | regulation of plant-type hypersensitive response                                                  |
|                      |                       | GO:0010051 | xylem and phloem pattern formation                                                                |
|                      |                       | GO:0031348 | negative regulation of defense response                                                           |
|                      |                       | GO:0010099 | regulation of photomorphogenesis                                                                  |
|                      |                       | GO:0048519 | negative regulation of biological process                                                         |
|                      |                       | GO:0009617 | response to bacterium                                                                             |
|                      |                       | GO:0010161 | red light signaling pathway                                                                       |
|                      |                       | GO:0009855 | determination of bilateral symmetry                                                               |
|                      |                       | GO:0010583 | response to cyclopentenone                                                                        |
|                      |                       | GO:0009648 | photoperiodism                                                                                    |
|                      |                       | GO:0010067 | procambium histogenesis                                                                           |
|                      |                       | GO:0048354 | mucilage biosynthetic process during seed coat development                                        |
|                      |                       | GO:0009944 | polarity specification of adaxial/abaxial axis                                                    |
|                      |                       | GO:0016020 | membrane                                                                                          |
|                      |                       | GO:0004497 | monoxygenase activity                                                                             |
|                      |                       | GO:0005506 | iron ion binding                                                                                  |
|                      |                       | GO:0020037 | heme binding                                                                                      |
|                      |                       | GO:0016705 | oxidoreductase activity, acting on paired donors, with incorporation/reduction of molecular O2    |
|                      |                       | GO:0005215 | transporter activity                                                                              |
|                      |                       | GO:0009963 | positive regulation of flavonoid biosynthetic process                                             |
|                      |                       | GO:0007169 | transmembrane receptor protein tyrosine kinase signaling pathway                                  |
|                      |                       | GO:0009741 | response to brassinosteroid stimulus                                                              |
|                      |                       | GO:0008152 | metabolic process                                                                                 |
|                      |                       | GO:0002237 | response to molecule of bacterial origin                                                          |
|                      |                       | GO:0009611 | response to wounding                                                                              |
|                      |                       | GO:0009751 | response to salicylic acid stimulus                                                               |
|                      |                       | GO:0006468 | protein amino acid phosphorylation                                                                |
|                      |                       | GO:0006805 | xenobiotic metabolic process                                                                      |
|                      |                       | GO:0009698 | phenylpropanoid metabolic process                                                                 |
|                      |                       | GO:0045487 | gibberellin catabolic process                                                                     |
|                      |                       | GO:0032940 | secretion by cell                                                                                 |
|                      |                       | GO:0009684 | indoleacetic acid biosynthetic process                                                            |
|                      |                       | GO:0009750 | response to fructose stimulus                                                                     |
|                      |                       | GO:0006833 | water transport                                                                                   |
|                      |                       | GO:0009718 | anthocyanin biosynthetic process                                                                  |
|                      |                       | GO:0009805 | coumarin biosynthetic process                                                                     |
|                      |                       | GO:0006535 | cysteine biosynthetic process from serine                                                         |
|                      |                       | GO:0019953 | sexual reproduction                                                                               |
|                      |                       | GO:0010167 | response to nitrate                                                                               |
|                      |                       | GO:0006629 | lipid metabolic process                                                                           |
|                      |                       | GO:0030003 | cellular cation homeostasis                                                                       |
|                      |                       | GO:0031347 | regulation of defense response                                                                    |
|                      |                       | GO:0048589 | developmental growth                                                                              |
|                      |                       | GO:0000082 | G1/S transition of mitotic cell cycle                                                             |
|                      |                       | GO:0050982 | detection of mechanical stimulus                                                                  |
|                      |                       | GO:0010214 | seed coat development                                                                             |
|                      |                       | GO:0009809 | lignin biosynthetic process                                                                       |
|                      |                       | GO:0005576 | extracellular region                                                                              |
|                      |                       | GO:0070825 | micropyle                                                                                         |
|                      |                       | GO:0005886 | plasma membrane                                                                                   |
|                      |                       | GO:0016747 | transferase activity, transferring acyl groups other than amino-acyl groups                       |
|                      |                       | GO:0016740 | transferase activity                                                                              |
|                      |                       | GO:0004713 | protein tyrosine kinase activity                                                                  |
|                      |                       | GO:0008131 | amine oxidase activity                                                                            |
|                      |                       | GO:0019825 | oxygen binding                                                                                    |
|                      |                       | GO:0016706 | oxidoreductase activity                                                                           |
|                      |                       | GO:0050362 | L-tryptophan:2-oxoglutarate aminotransferase activity                                             |
|                      |                       | GO:0080097 | L-tryptophan:pyruvate aminotransferase activity                                                   |
|                      |                       | GO:0004672 | protein kinase activity                                                                           |
|                      |                       | GO:0004674 | protein serine/threonine kinase activity                                                          |
|                      |                       | GO:0051119 | sugar transmembrane transporter activity                                                          |
|                      |                       | GO:0008289 | lipid binding                                                                                     |
|                      |                       | GO:0016772 | transferase activity, transferring phosphorus-containing groups                                   |
|                      |                       | GO:0016846 | carbon-sulfur lyase activity                                                                      |
|                      |                       | GO:0008146 | sulfotransferase activity                                                                         |
|                      |                       | GO:0080131 | hydroxyjasmonate sulfotransferase activity                                                        |
|                      |                       | GO:0017057 | 6-phosphogluconolactonase activity                                                                |
|                      |                       | GO:0047172 | shikimate O-hydroxycinnamoyltransferase activity                                                  |
|                      |                       | GO:0047205 | quininate O-hydroxycinnamoyltransferase activity                                                  |
|                      |                       | GO:0016207 | 4-coumarate-CoA ligase activity                                                                   |
|                      |                       | GO:0008381 | mechanically-gated ion channel activity                                                           |
|                      |                       | GO:0016682 | oxidoreductase activity, acting on diphenols and related substances as donors, oxygen as acceptor |
|                      |                       | GO:0015145 | monosaccharide transmembrane transporter activity                                                 |

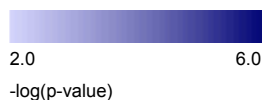

D

overrepresented GO terms in  
t = 11.5 h, downregulated (p < 0.01)

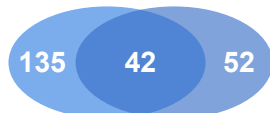

*G. pyrenaicum*    *G. robertianum*

*G. pyrenaicum*  
*G. robertianum*

| GOID       | description                                                    |
|------------|----------------------------------------------------------------|
| GO:0019684 | photosynthesis, light reaction                                 |
| GO:0015979 | photosynthesis                                                 |
| GO:0006098 | pentose-phosphate shunt                                        |
| GO:0055114 | oxidation reduction                                            |
| GO:0019252 | starch biosynthetic process                                    |
| GO:0043085 | positive regulation of catalytic activity                      |
| GO:0008152 | metabolic process                                              |
| GO:0010218 | response to far red light                                      |
| GO:0009744 | response to sucrose stimulus                                   |
| GO:0010310 | regulation of hydrogen peroxide metabolic process              |
| GO:0009718 | anthocyanin biosynthetic process                               |
| GO:0042742 | defense response to bacterium                                  |
| GO:0043900 | regulation of multi-organism process                           |
| GO:0009595 | detection of biotic stimulus                                   |
| GO:0009813 | flavonoid biosynthetic process                                 |
| GO:0006979 | response to oxidative stress                                   |
| GO:0015976 | carbon utilization                                             |
| GO:0010037 | response to carbon dioxide                                     |
| GO:0009830 | cell wall modification during abscission                       |
| GO:0034484 | raffinose catabolic process                                    |
| GO:0009751 | response to salicylic acid stimulus                            |
| GO:0009809 | lignin biosynthetic process                                    |
| GO:0030388 | fructose 1,6-bisphosphate metabolic process                    |
| GO:0009579 | thylakoid                                                      |
| GO:0005576 | extracellular region                                           |
| GO:0009570 | chloroplast stroma                                             |
| GO:0010319 | stromule                                                       |
| GO:0048046 | apoplast                                                       |
| GO:0016491 | oxidoreductase activity                                        |
| GO:0020037 | heme binding                                                   |
| GO:0016705 | oxidoreductase activity, acting on paired donors               |
| GO:0009055 | electron carrier activity                                      |
| GO:0019825 | oxygen binding                                                 |
| GO:0005506 | iron ion binding                                               |
| GO:0008194 | UDP-glycosyltransferase activity                               |
| GO:0016706 | oxidoreductase activity                                        |
| GO:0016298 | lipase activity                                                |
| GO:0004185 | serine-type carboxypeptidase activity                          |
| GO:0004089 | carbonate dehydratase activity                                 |
| GO:0015171 | amino acid transmembrane transporter activity                  |
| GO:0008289 | lipid binding                                                  |
| GO:0042132 | fructose 1,6-bisphosphate 1-phosphatase activity               |
| GO:0010207 | photosystem II assembly                                        |
| GO:0000023 | maltose metabolic process                                      |
| GO:0070838 | divalent metal ion transport                                   |
| GO:0009657 | plastid organization                                           |
| GO:0009773 | photosynthetic electron transport in photosystem I             |
| GO:0030003 | cellular cation homeostasis                                    |
| GO:0006364 | rRNA processing                                                |
| GO:0010027 | thylakoid membrane organization                                |
| GO:0019761 | glucosinolate biosynthetic process                             |
| GO:0009637 | response to blue light                                         |
| GO:0035304 | regulation of protein amino acid dephosphorylation             |
| GO:0019288 | isopentenyl diphosphate biosynthetic process                   |
| GO:0010155 | regulation of proton transport                                 |
| GO:0016117 | carotenoid biosynthetic process                                |
| GO:0015995 | chlorophyll biosynthetic process                               |
| GO:0009902 | chloroplast relocation                                         |
| GO:0010114 | response to red light                                          |
| GO:0019344 | cysteine biosynthetic process                                  |
| GO:0010103 | stomatal complex morphogenesis                                 |
| GO:0016556 | mRNA modification                                              |
| GO:0015996 | chlorophyll catabolic process                                  |
| GO:0034660 | ncRNA metabolic process                                        |
| GO:0006612 | protein targeting to membrane                                  |
| GO:0010363 | regulation of plant-type hypersensitive response               |
| GO:0009611 | response to wounding                                           |
| GO:0009862 | systemic acquired resistance, salicylic acid signaling pathway |

*G. pyrenaicum*  
*G. robertianum*

| GOID       | description                                                   |
|------------|---------------------------------------------------------------|
| GO:0009765 | photosynthesis, light harvesting                              |
| GO:0005975 | carbohydrate metabolic process                                |
| GO:0030154 | cell differentiation                                          |
| GO:0010304 | PSII associated light-harvesting complex II catabolic process |
| GO:0019760 | glucosinolate metabolic process                               |
| GO:0009867 | jasmonic acid mediated signaling pathway                      |
| GO:0009814 | defense response, incompatible interaction                    |
| GO:0009965 | leaf morphogenesis                                            |
| GO:0000165 | MAPKKK cascade                                                |
| GO:0009409 | response to cold                                              |
| GO:0050832 | defense response to fungus                                    |
| GO:0009963 | positive regulation of flavonoid biosynthetic process         |
| GO:0006636 | unsaturated fatty acid biosynthetic process                   |
| GO:0006508 | proteolysis                                                   |
| GO:0010106 | cellular response to iron ion starvation                      |
| GO:0009767 | photosynthetic electron transport chain                       |
| GO:0006952 | defense response                                              |
| GO:0055085 | transmembrane transport                                       |
| GO:0009617 | response to bacterium                                         |
| GO:0009699 | phenylpropanoid biosynthetic process                          |
| GO:0009684 | indoleacetic acid biosynthetic process                        |
| GO:0010043 | response to zinc ion                                          |
| GO:0009750 | response to fructose stimulus                                 |
| GO:0042793 | transcription from plastid promoter                           |
| GO:0006569 | tryptophan catabolic process                                  |
| GO:0009753 | response to jasmonic acid stimulus                            |
| GO:0006857 | oligopeptide transport                                        |
| GO:0009697 | salicylic acid biosynthetic process                           |
| GO:0019375 | galactolipid biosynthetic process                             |
| GO:0009768 | photosynthesis, light harvesting in photosystem I             |
| GO:0015977 | carbon utilization by fixation of carbon dioxide              |
| GO:0015969 | guanosine tetraphosphate metabolic process                    |
| GO:0031348 | negative regulation of defense response                       |
| GO:0016036 | cellular response to phosphate starvation                     |
| GO:0016120 | carotene biosynthetic process                                 |
| GO:0009269 | response to desiccation                                       |
| GO:0010264 | myo-inositol hexakisphosphate biosynthetic process            |
| GO:0042744 | hydrogen peroxide catabolic process                           |
| GO:0006869 | lipid transport                                               |
| GO:0002238 | response to molecule of fungal origin                         |
| GO:0006817 | phosphate transport                                           |
| GO:0009694 | jasmonic acid metabolic process                               |
| GO:0046777 | protein amino acid autophosphorylation                        |
| GO:0000413 | protein peptidyl-prolyl isomerization                         |
| GO:0009695 | jasmonic acid biosynthetic process                            |
| GO:0006655 | phosphatidylglycerol biosynthetic process                     |
| GO:0010270 | photosystem II oxygen evolving complex assembly               |
| GO:0006598 | polyamine catabolic process                                   |
| GO:0015994 | chlorophyll metabolic process                                 |
| GO:0019748 | secondary metabolic process                                   |
| GO:0006805 | xenobiotic metabolic process                                  |
| GO:0010351 | lithium ion transport                                         |
| GO:0034440 | lipid oxidation                                               |
| GO:0009821 | alkaloid biosynthetic process                                 |
| GO:0006826 | iron ion transport                                            |
| GO:0019464 | glycine decarboxylation via glycine cleavage system           |
| GO:0043086 | negative regulation of catalytic activity                     |
| GO:0044265 | cellular macromolecule catabolic process                      |
| GO:0018208 | peptidyl-proline modification                                 |
| GO:0005985 | sucrose metabolic process                                     |
| GO:0015698 | inorganic anion transport                                     |
| GO:0010271 | regulation of chlorophyll catabolic process                   |
| GO:0010115 | regulation of abscisic acid biosynthetic process              |
| GO:0042549 | photosystem II stabilization                                  |
| GO:0009698 | phenylpropanoid metabolic process                             |
| GO:0009535 | chloroplast thylakoid membrane                                |
| GO:0009507 | chloroplast                                                   |
| GO:0009534 | chloroplast thylakoid                                         |
| GO:0009941 | chloroplast envelope                                          |
| GO:0010287 | plastoglobule                                                 |
| GO:0031977 | thylakoid lumen                                               |
| GO:0009543 | chloroplast thylakoid lumen                                   |
| GO:0030095 | chloroplast photosystem II                                    |
| GO:0009522 | photosystem I                                                 |
| GO:0009523 | photosystem II                                                |
| GO:0009654 | oxygen evolving complex                                       |
| GO:0010598 | NAD(P)H dehydrogenase complex (plastoquinone)                 |
| GO:0030076 | light-harvesting complex                                      |
| GO:0005777 | peroxisome                                                    |
| GO:0009538 | photosystem I reaction center                                 |
| GO:0016020 | membrane                                                      |

## D (continued)

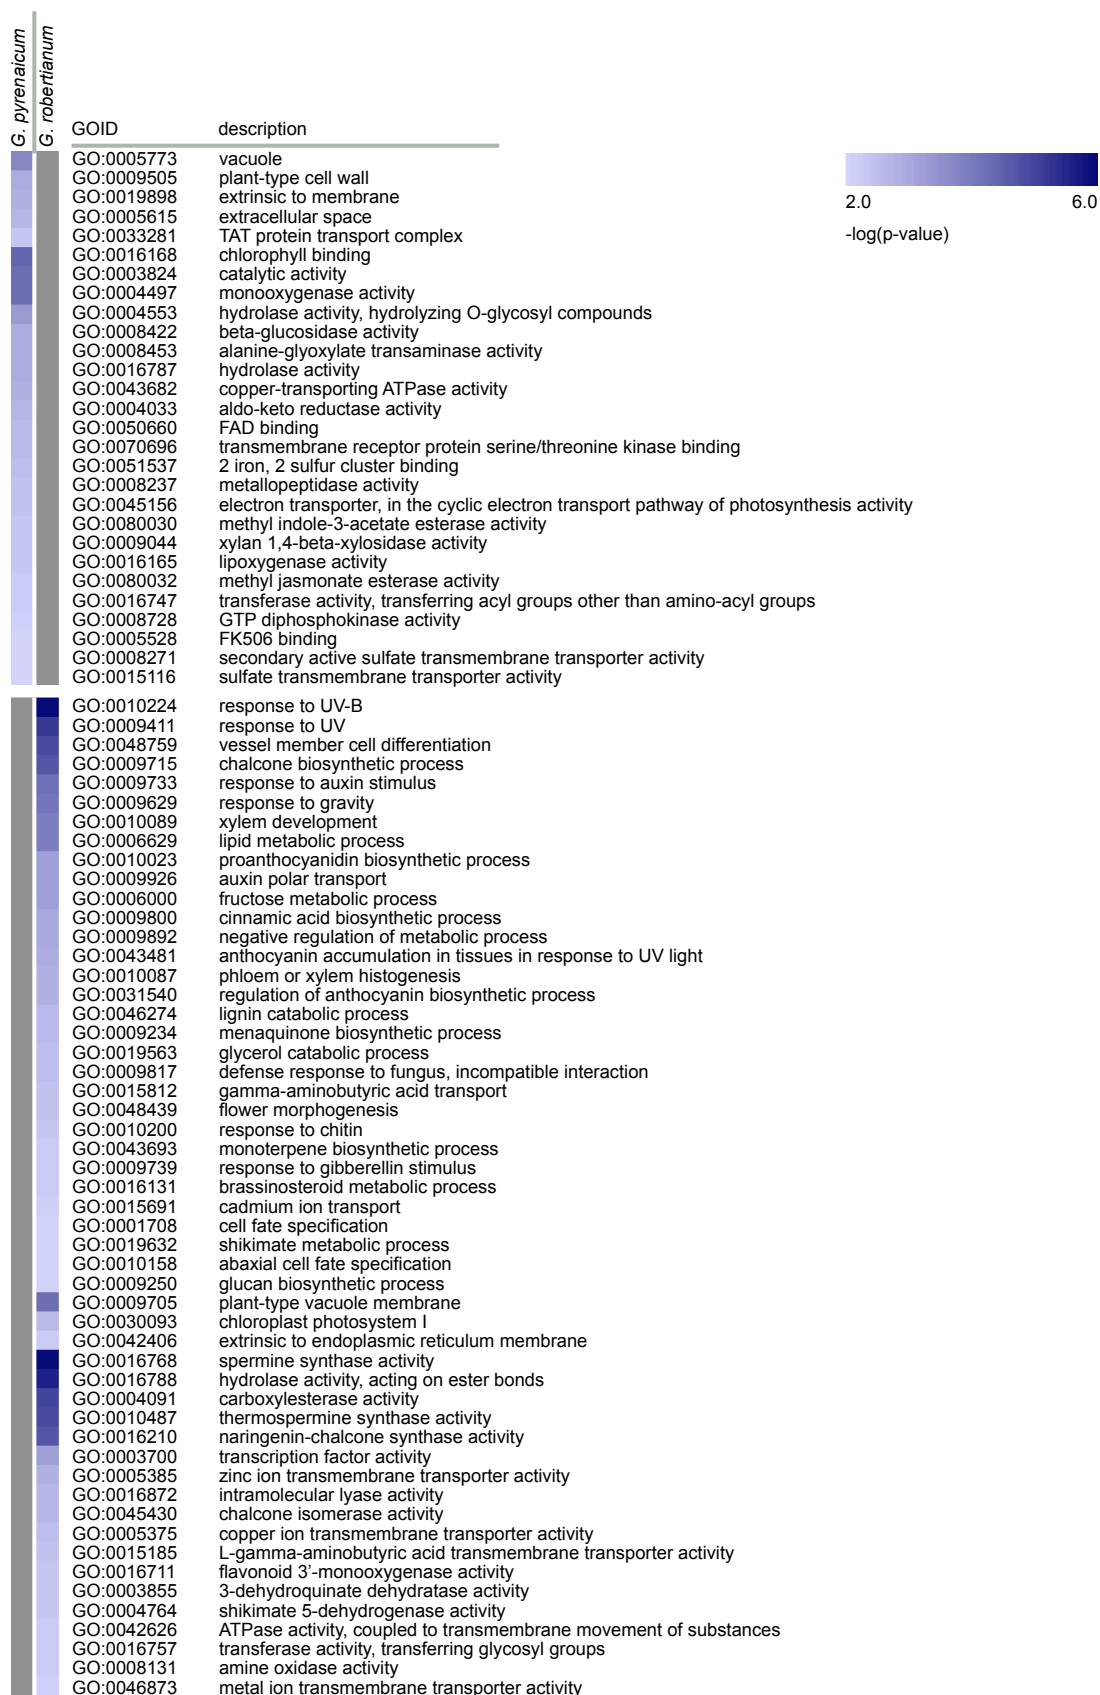







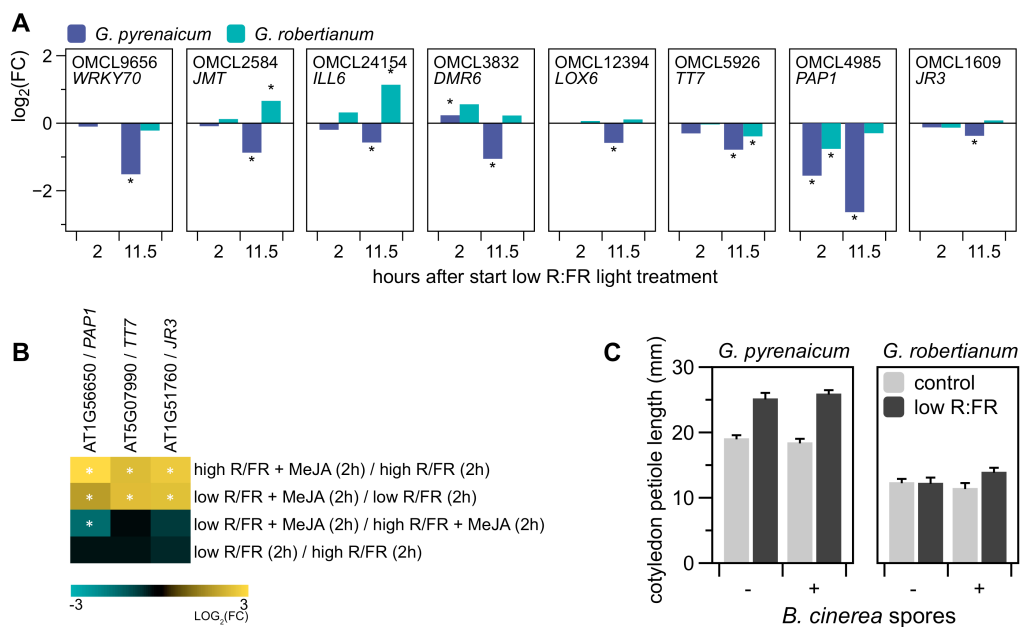

**Supplemental Figure 5. Low R:FR light affects meJA-induced transcript abundance in the Geraniums and *A. thaliana*, and pathogen infection does not affect *Geranium* growth in the shade.** (Supports Figure 4.) (A)  $\text{Log}_2$  fold-changes of a subset of OMCL groups from the GO clusters shown in Fig. 4A. Asterisks represent significant differences between low R:FR and control ( $p < 0.01$ , qCML method, followed by an exact test). (B) Heat map representing log fold changes for *PAP1*, *TT7* and *JR3*, upon a meJA (100  $\mu\text{M}$ ) treatment in a control (R:FR = 1.8) or low (R:FR = 0.2) R:FR light environment in *A. thaliana*. Samples harvested 2 hours after start of the hormone and light treatment,  $n = 3$ . Asterisks represent a significant difference between the presented conditions ( $p < 0.01$ ). Data taken from de Wit et al., 2013. (C) Petiole length of *G. pyrenaicum* (left) and *G. robertianum* (right) cotyledons (mm), with or without *B. cinerea* infection, in a control (R:FR = 1.8) or low R:FR (R:FR = 0.2) light treatment. Data represent means + SEM,  $n = 28$ .

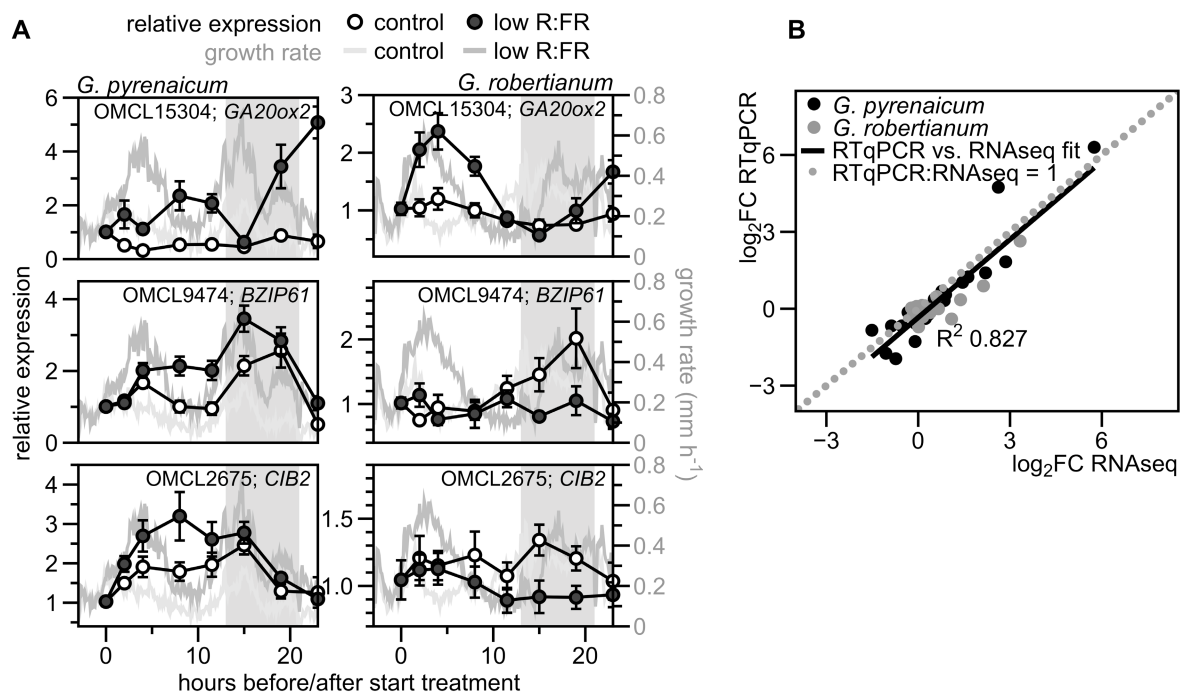

**Supplemental Figure 6. RT qPCR on *Geranium* transcripts and validation of RNA sequencing.** (Supports Figure 6.) (A) Relative OMCL group expression (orthologues of *GA20OX2*, *BZIP61* and *CIB2*) over time in *G. pyrenaicum* (left panels) and *G. robertianum* (right panels) in control (R:FR = 1.8; open circles) and low R:FR (R:FR = 0.2; dark circles) conditions, on the left y-axis. Data are relative to the reference gene (orthologue of *PDF1*) and to  $t = 0$  (10:00 am), data represent means  $\pm$  SEM,  $n = 5$  (biological replicates are a pool of the second petiole of three individual plants). Right y-axis and grey lines represent growth rates in  $\text{mm h}^{-1}$  over the same time period in control (light grey) and low R:FR (darker grey) conditions (same data as Fig. 1C). Grey area represents the night period. (B) Comparison of the  $\log_2$  fold-changes of several OMCL groups determined by RNAseq (x-axis) and real-time quantitative PCR (y-axis). Analyses were performed on a different set of samples, harvested under the same conditions; low R:FR vs. control light,  $t = 2$  h and  $t = 11.5$  h.

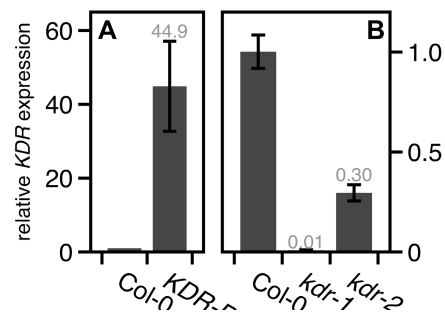

**Supplemental Figure 7. Confirmation of *kdr* mutants.** (Supports Figure 7.) (A and B) Relative *KDR* expression in Col-0 wild-type, *KDR* over-expressing *KDR-D* (A) and knock-out *kdr-1* and knock-down *kdr-2* (B), relative to Col-0 and reference genes *UBQ5* (*KDR-D*) and *APT* (*kdr-1* and *kdr-2*). Data represent means  $\pm$  SEM, n = 2-3.

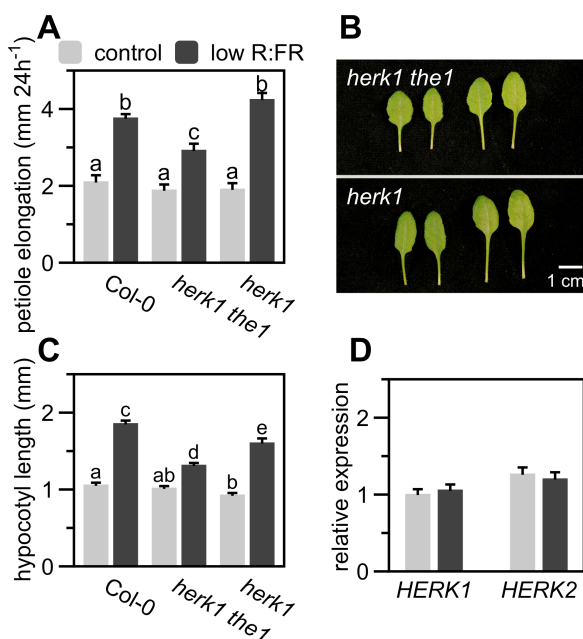

**Supplemental Figure 8. HERK1 has no function in the *A. thaliana* shade avoidance syndrome.** (Supports Figure 7.) (A) Petiole elongation (mm 24 h<sup>-1</sup>) of *A. thaliana* *herk1the1* and *herk1* mutants, and WT control (Col-0), grown in control white light (R:FR = 1.8) or low R:FR (R:FR = 0.2) conditions. Data represent means + SEM, n = 10. Different letters indicate significant differences (p < 0.05, 2-way ANOVA with post-hoc Tukey test). (B) Pictures of representative leaves of *herk1the1* and *herk1* grown for five days in control white light (left pair) or low R:FR (right pair) conditions. (C) Hypocotyl length (mm) of lines shown in (A), after four days of control white light or low R:FR treatment. Data represent means + SEM, n = 40. Different letters indicate significant differences (p < 0.05, 2-way ANOVA with post-hoc Tukey test). (D) Relative expression of *HERK1* and *HERK2* in *A. thaliana* (Col-0) petioles exposed to control white or low R:FR light for 4 hours. Data represent means + SEM, data is relative to reference genes and control, n = 6.

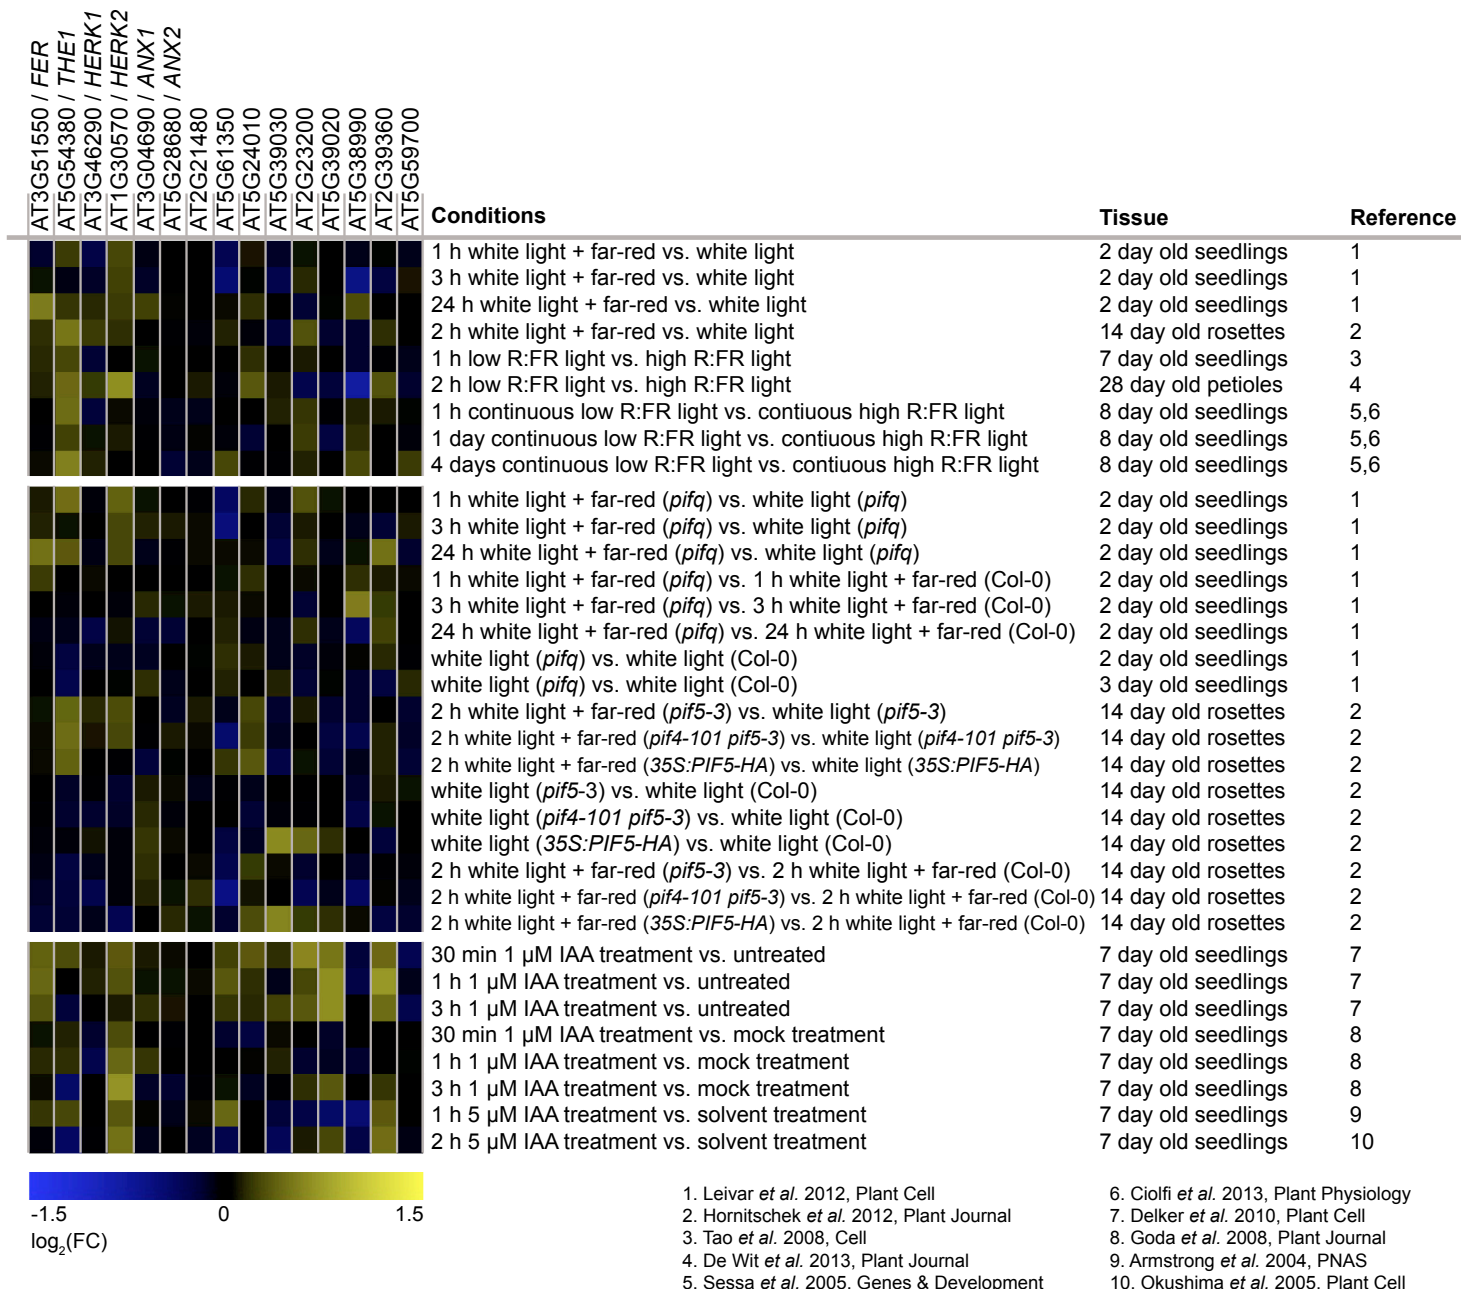

**Supplemental Figure 9. RLK gene expression is hardly affected by low R:FR, *pif* mutations and IAA in previous transcriptome studies.** (Supports Figure 9.) Heatmap showing transcriptional Log<sub>2</sub> fold-changes of *THE1*, *FER* and several other RLK-encoding genes in previous micro-array studies with various R:FR ratios, different *pif*-deficient and over-expressing mutants, and IAA treatments. Data were obtained via the Genevestigator programme and numbers refer to the publications of the original datasets.



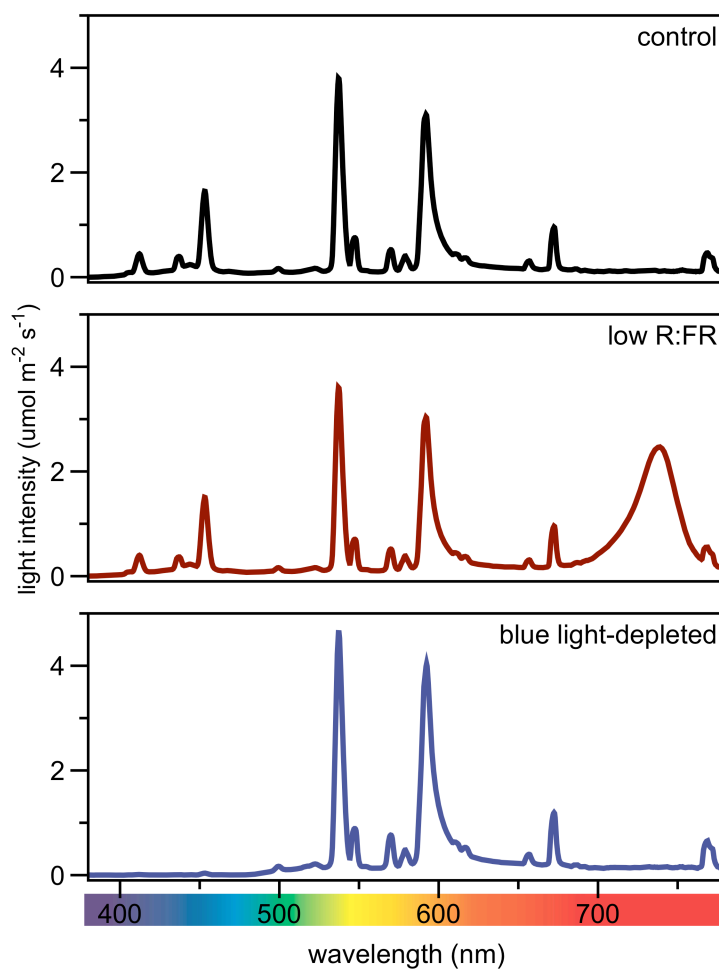

**Supplemental Figure 10. Light spectra of the treatments used in this study.** Light spectra of control white light (R:FR = 1.8, upper), low R:FR (0.2, middle) and blue light-depleted (R:FR = 1.8, 4 μmol m<sup>-2</sup> s<sup>-1</sup> B, lower) treatments, given in μmol m<sup>-2</sup> s<sup>-1</sup> nm<sup>-1</sup>.

**Supplemental Table 1.** List of all primers used for RT qPCR on *G. pyrenaicum*, *G. robertianum* and *A. thaliana* in this study.

| Species               | OMCL group         | Description             | Forward               | Reverse                |
|-----------------------|--------------------|-------------------------|-----------------------|------------------------|
| <i>G. pyrenaicum</i>  | OMCL1609           | <i>JR3</i>              | TTTTGCCCTTCACCTCGTT   | ATGCCACACTACCATGCTC    |
|                       | OMCL5926           | <i>TT7</i>              | ATCTTCCTGAACAAGCGCCA  | GAGCCAAACACGTCGCTTAC   |
|                       | OMCL4985           | <i>PAP1</i>             | TCAACCACCTCAGTCTACAGC | TGGTGAAGGAAGATGGCACC   |
|                       | OMCL14968          | <i>KDR</i>              | CATGATCTCCGACGACCAGA  | CTTGCAACACCTTCGAAGCT   |
|                       | OMCL1872           | <i>THE1</i>             | GGGCCACACAGCAACAATAA  | TTCTTCTTCGTCGGCAGAT    |
|                       | OMCL2164           | <i>FER</i>              | CAGCAGGGTACGTAACAGTC  | ACGGGATTGTTTCAGGTCATG  |
|                       | OMCL15305          | <i>GA20OX2</i>          | ATTACCACGCACACTCCCTT  | CGGGCCTGATTTTGAACCAA   |
|                       | OMCL2675           | <i>CIB</i>              | TTCCAAGGTTGCATCAGAGG  | GCTCCAAATTGCCGTCTTTC   |
|                       | OMCL9475           | <i>BZIP61</i>           | AGTGGTGCGTTCTGGCTAAA  | TGTCACAATCTGGCCCCATC   |
| OMCL703               | <i>PDF1 (ref.)</i> | TCTGGAGACCTTTGCTCTG     | CCACCAGATCACTCTCCCTC  |                        |
| <i>G. robertianum</i> | OMCL1609           | <i>JR3</i>              | CCCRACTGTGAACGATCCAA  | CGGTGAAAGTTGGAGCCAGT   |
|                       | OMCL5926           | <i>TT7</i>              | TCTCGCCCAACAACAGAGTC  | GACGTCAAGCACTGTGGAGT   |
|                       | OMCL4985           | <i>PAP1</i>             | TCGCTGTTCTTCCAAACCCA  | TGATCCAGCTTTTCGACCACA  |
|                       | OMCL14968          | <i>KDR</i>              | GGATGATTTGAGCGAGCGTT  | TGCGAATAATGGCTGCTTGA   |
|                       | OMCL1872           | <i>THE1</i>             | AGGTTGAAGTTTCCGTTGCC  | ACACCCGAAACAGCTCCTAA   |
|                       | OMCL2164           | <i>FER</i>              | GTCATGTTCCGATCAGCAGT  | CGGGACTGTTTAGGTCATGG   |
|                       | OMCL15305          | <i>GA20OX2</i>          | CTGCCACTTGTTTTCCGGTGA | TCAGGATTGACACTCGGGAC   |
|                       | OMCL2675           | <i>CIB</i>              | TGCTCAACCTTCATATGCC   | TCGGGATTCTGAGACGATGA   |
|                       | OMCL9475           | <i>BZIP61</i>           | TTACCGCCCAAAGTACCGAC  | AGTCGTCCACCCAACAAGTT   |
| OMCL703               | <i>PDF1 (ref.)</i> | CCAGAGGCGATGAAGACTGA    | TTCCCAAGTTTGATGCAGC   |                        |
| <i>A. thaliana</i>    |                    | <i>KDR</i>              | CAACACCTCATCCCTGAACT  | ACGGTCACTGAGGTCATCAAC  |
|                       |                    | <i>THE1</i>             | GTTCTTTGGTTGGTGCGGTT  | TTCTTGAGGACTCGTCGACC   |
|                       |                    | <i>FER</i>              | GGTTTCTTCCCGATTCTTCAG | AGAAGAAGAAGAGAGACGGAA  |
|                       |                    | <i>IAA19</i>            | GCTGTAAGGAAGCTTCGACC  | ACCATCTTTCAAGGCCACAC   |
|                       |                    | <i>ATHB2</i>            | CGAGCAAGACAAGTGAAGT   | ATTCTCGCAGCATCTCCGTA   |
|                       |                    | <i>HERK1</i>            | TCCTTTCATGGGACCGTTACT | CCATGGCAGATACAAAGCAAGA |
|                       |                    | <i>HERK2</i>            | TCGACTGGTCACTCGGTAAG  | TGCTTCGCCTTTTCTTGCAT   |
|                       |                    | <i>APT1 (ref.)</i>      | AATGGCGACTGAAGATGTGC  | TCAGTGTGAGAAGAAGCGT    |
|                       |                    | <i>AT1G13320 (ref.)</i> | GTAGGACCGGAGCCAAGTAG  | ACAGGGAAGAATGTGCTGGA   |
|                       |                    | <i>UBQ5 (ref.)</i>      | CGGACCAGCAGCGATTGATT  | CCTCTTCTTAGCACCACCAG   |
|                       |                    | <i>AT4G26410 (ref.)</i> | ATTGGTGTGCTGCTAGTCT   | TAAAGCCGTCTCTCAAGCA    |
